# Supplementary material for: Sustainability of Vertical Farming in Comparison with Conventional Farming: A Case Study in Miyagi Prefecture, Japan, on Nitrogen and Phosphorus Footprint
Source: MDPI journal article supplement (doi:10.3390/su14021042), 2022-01-17
Supplement: s1 [file s1]

# Supplementary Material for Sustainability of Vertical Farming in Comparison with Conventional Farming: A Case Study in Miyagi Prefecture, Japan, on Nitrogen and Phosphorus Footprint

Jiarui Liu, Azusa Oita, Kentaro Hayashi and Kazuyo Matsubae

E-mail: [liu.jiarui.r7@dc.tohoku.ac.jp](mailto:liu.jiarui.r7@dc.tohoku.ac.jp)

## Table of content

**Table S1.** The categories of 36 vegetables consumed in Miyagi Prefecture, Japan, produced via conventional farming, including 9 target vegetables whose import ratios were above average in Japan in 2018

| Vegetable Categories                 | Scientific Name                                                                   |
|--------------------------------------|-----------------------------------------------------------------------------------|
| Japanese radish                      | <i>Raphanus sativus</i> var. <i>longipinnatus</i>                                 |
| Turnips                              | <i>Brassica rapa</i> var. <i>glabra</i> and <i>Brassica rapa</i> var. <i>rapa</i> |
| Carrots                              | <i>Daucus carota</i> subsp. <i>sativus</i>                                        |
| Edible burdock (great burdock)       | <i>Arctium lappa</i>                                                              |
| Lotus root                           | <i>Nelumbo nucifera</i>                                                           |
| Chinese cabbage                      | <i>Brassica rapa</i> var. <i>pekinensis</i>                                       |
| Japanese mustard spinach (Komatsuna) | <i>Brassica rapa</i> var. <i>perviridis</i>                                       |
| Cabbage                              | <i>Brassica oleracea</i> var. <i>capitata</i>                                     |
| Pak choi (bok choy)                  | <i>Brassica rapa</i> var. <i>chinensis</i>                                        |
| Spinach*                             | <i>Spinacia oleracea</i>                                                          |
| Butterbur                            | <i>Petasites japonicus</i>                                                        |
| Japanese honewort                    | <i>Cryptotaenia canadensis</i> subsp. <i>Japonica</i>                             |
| Garland chrysanthemum (crown daisy)  | <i>Glebionis coronaria</i>                                                        |
| Celery*                              | <i>Apium graveolens</i> var. <i>dulce</i>                                         |
| Asparagus*                           | <i>Asparagus officinalis</i>                                                      |
| Cauliflower                          | <i>Brassica oleracea</i> var. <i>botrytis</i>                                     |
| Broccoli*                            | <i>Brassica oleracea</i> var. <i>italica</i>                                      |
| Lettuce                              | <i>Lactuca sativa</i>                                                             |
| Welsh onion*                         | <i>Allium fistulosum</i>                                                          |
| Chinese leek (garlic chives)         | <i>Allium tuberosum</i>                                                           |
| Onion                                | <i>Allium cepa</i>                                                                |
| Garlic                               | <i>Allium sativum</i>                                                             |
| Water greens (Mizuna)                | <i>Brassica rapa</i> var. <i>laciniifolia</i>                                     |
| Cucumbers                            | <i>Cucumis sativus</i>                                                            |
| Pumpkins and squashes*               | <i>Cucurbita</i> spp.                                                             |
| Eggplants                            | <i>Solanum melongena</i>                                                          |
| Tomato*                              | <i>Solanum lycopersicum</i>                                                       |
| Sweet pepper (bell pepper)*          | <i>Capsicum annuum</i> var. <i>groszum</i>                                        |
| Kidney beans, green pod              | <i>Phaseolus vulgaris</i>                                                         |
| Peas, green pod                      | <i>Pisum sativum</i>                                                              |
| Broad bean (faba bean)               | <i>Vicia faba</i>                                                                 |
| Soybeans, green                      | <i>Glycine max</i>                                                                |

---

|            |                            |
|------------|----------------------------|
| Ginger     | <i>Zingiber officinale</i> |
| Strawberry | <i>Fragaria × ananassa</i> |
| Melon*     | <i>Cucumis melo</i>        |
| Watermelon | <i>Citrullus lanatus</i>   |

---

\* The target vegetables which import ratio were over average in Japan in 2018

#### Reference

Oita, A.; Katagiri, K.; Eguchi, T.; Morioka, R.; Shindo, J.; Hayashi, K.; Matsubae, K., Nutrient-Extended Input–Output (Nutrio) Method for the Food Nitrogen Footprint. *Environmental Research Letters* **2021**, *16*, (11), 115010.
